# Supplementary material for: Navigating the Chemical Space and Chemical Multiverse of a Unified Latin American Natural Product Database: LANaPDB
Source: MDPI journal article supplement (doi:10.3390/ph16101388), 2023-09-30
Supplement: s1 [file s1]

## SUPPLEMENTARY MATERIAL

**Table S1.** Websites of the natural product databases of Latin America.

| Database name       | Country     | Database website                                                                                                                                                      |
|---------------------|-------------|-----------------------------------------------------------------------------------------------------------------------------------------------------------------------|
| NaturAr             | Argentina   | <a href="https://naturar.quimica.unlp.edu.ar/es/">https://naturar.quimica.unlp.edu.ar/es/</a>                                                                         |
| NuBBE <sub>DB</sub> | Brazil      | <a href="http://nubbe.iq.unesp.br/portal/nubbe-search.html">http://nubbe.iq.unesp.br/portal/nubbe-search.html</a>                                                     |
| SistematX           | Brazil      | <a href="https://sistematx.ufpb.br/">https://sistematx.ufpb.br/</a>                                                                                                   |
| UEFS                | Brazil      | <a href="http://zinc12.docking.org/catalogs/uefsnp">http://zinc12.docking.org/catalogs/uefsnp</a>                                                                     |
| NAPRORE-CR          | Costa Rica  | *                                                                                                                                                                     |
| LAIPNUDELSAV        | El Salvador | *                                                                                                                                                                     |
| UNIIQUIM            | Mexico      | <a href="https://uniquim.iqimica.unam.mx/">https://uniquim.iqimica.unam.mx/</a>                                                                                       |
| BIOFACQUIM          | Mexico      | Database version 2<br><a href="https://figshare.com/articles/dataset/BIOFACQUIM_V2_sdf/11312702">https://figshare.com/articles/dataset/BIOFACQUIM_V2_sdf/11312702</a> |
| CIFPMA              | Panama      | *                                                                                                                                                                     |
| PeruNPDB            | Peru        | <a href="https://perunpdb.com.pe/">https://perunpdb.com.pe/</a>                                                                                                       |

\*No available.

**Table S2.** Rules of thumb - guides - associated with drug-likeness.

|                              | Molecular weight | LogP     | Number of hydrogen bond acceptors | Number of hydrogen bond donors | Sum of hydrogen bond acceptors and donors | Topological polar surface area | Number of rotatable bonds | References |
|------------------------------|------------------|----------|-----------------------------------|--------------------------------|-------------------------------------------|--------------------------------|---------------------------|------------|
| Lipinski's rule of 5         | $\leq 500$       | $\leq 5$ | $\leq 10$                         | $\leq 5$                       |                                           |                                |                           | [1,2]      |
| Veber's rules                |                  |          |                                   |                                | $\leq 12$                                 | $\leq 140$                     | $\leq 10$                 | [3]        |
| GlaxoSmithKline's 4/400 rule | $<400$           | $<4$     |                                   |                                |                                           |                                |                           | [4]        |
| Pfizer 3/75 rule             |                  | $>3$     |                                   |                                |                                           | $< 75$                         |                           | [5]        |

**Table S3.** Analysis metrics of the principal component analysis.

| Descriptors                                      | LaNaPDB, COCONUT and approved drugs comparison |             | Latin American countries comparison |             |
|--------------------------------------------------|------------------------------------------------|-------------|-------------------------------------|-------------|
|                                                  | PC1*                                           | PC2**       | PC1                                 | PC2         |
| SlogP                                            | 0.14028102                                     | -0.79233759 | 0.23778911                          | -0.67762065 |
| Topological polar surface area                   | -0.4891108                                     | 0.11257005  | -0.51947212                         | 0.08670239  |
| Molecular weight                                 | -0.45033318                                    | -0.27365197 | -0.42878314                         | -0.37683651 |
| Number of rotatable bonds                        | -0.31703665                                    | -0.50279962 | -0.24992425                         | -0.58680117 |
| Number of hydrogen bond donors                   | -0.4633437                                     | 0.14429034  | -0.41631399                         | 0.21532234  |
| Number of hydrogen bond acceptors                | -0.47232644                                    | 0.10495983  | -0.50395496                         | 0.02465498  |
| Explained variance percentage                    | 67.1%                                          | 22.2%       | 59.8%                               | 24.8%       |
| Sum of PC1 and PC2 explained variance percentage | 89.3%                                          |             | 84.6%                               |             |

\*Principal component 1; \*\*Principal component 2

## References

1. Lipinski, C.A.; Lombardo, F.; Dominy, B.W.; Feeney, P.J. Experimental and computational approaches to estimate solubility and permeability in drug discovery and development settings. *Adv. Drug Deliv. Rev.* **2001**, *46*, 3–26, doi:10.1016/S0169-409X(00)00129-0.
2. Lipinski, C.A. Lead- and drug-like compounds: the rule-of-five revolution. *Drug Discov. Today Technol.* **2004**, *1*, 337–341, doi:10.1016/j.ddtec.2004.11.007.
3. Veber, D.F.; Johnson, S.R.; Cheng, H.-Y.; Smith, B.R.; Ward, K.W.; Kopple, K.D. Molecular properties that influence the oral bioavailability of drug candidates. *J. Med. Chem.* **2002**, *45*, 2615–2623, doi:10.1021/jm020017n.
4. Gleeson, M.P. Generation of a set of simple, interpretable ADMET rules of thumb. *J. Med. Chem.* **2008**, *51*, 817–834, doi:10.1021/jm701122q.
5. Hughes, J.D.; Blagg, J.; Price, D.A.; Bailey, S.; Decrescenzo, G.A.; Devraj, R.V.; Ellsworth, E.; Fobian, Y.M.; Gibbs, M.E.; Gilles, R.W.; Greene, N.; Huang, E.; Krieger-Burke, T.; Loesel, J.; Wager, T.; Whiteley, L.; Zhang, Y. Physiochemical drug properties associated with in vivo toxicological outcomes. *Bioorg. Med. Chem. Lett.* **2008**, *18*, 4872–4875, doi:10.1016/j.bmcl.2008.07.071.
